# Supplementary material for: Rapid and selective detection of Hg(ii) in water using AuNP in situ-modified filter paper by a head-space solid phase extraction Zeeman atomic absorption spectroscopy method
Source: Royal Society of Chemistry journal article supplement (doi:10.1039/d0nj02294b), 2020-01-01
Supplement: d0nj02294b1.pdf [file d0nj02294b1.pdf]

## Supporting information

### **Rapid and selective detection of Hg(II) in water using AuNPs in-situ modified filter paper by head-space solid phase extraction Zeeman atomic absorption spectroscopy method**

Yongqian Lei<sup>a</sup>, Fang Zhang<sup>a</sup>, Peng Guan<sup>a</sup>, Pengran Guo<sup>\*,a</sup>, Guanhua Wang<sup>\*,b</sup>

<sup>a</sup>Guangdong Provincial Key laboratory of Emergency Test for Dangerous Chemicals, Guangdong Engineering Technology Research Center of On-line Monitoring of Water Environmental Pollution, Guangdong Institute of Analysis, Guangdong Academy of Sciences, Guangzhou, 510070.

<sup>b</sup>College of Veterinary Medicine, South China Agricultural University, Guangzhou 510642.

\*Coresponding author: [prguo@fenxi.com.cn](mailto:prguo@fenxi.com.cn), [ghwang@scau.edu.cn](mailto:ghwang@scau.edu.cn)

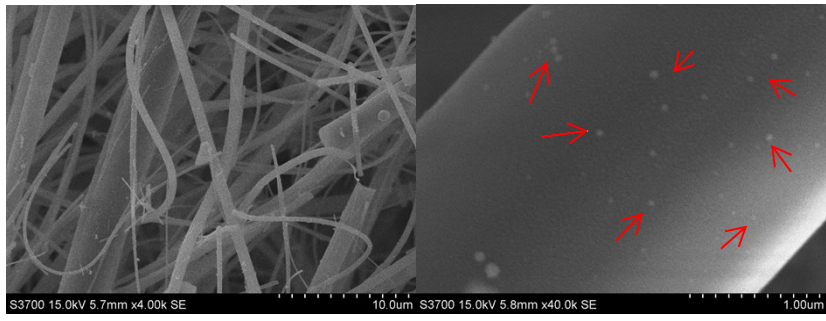

Figure S1 the microstructure of AuNPs modified filter paper fibre

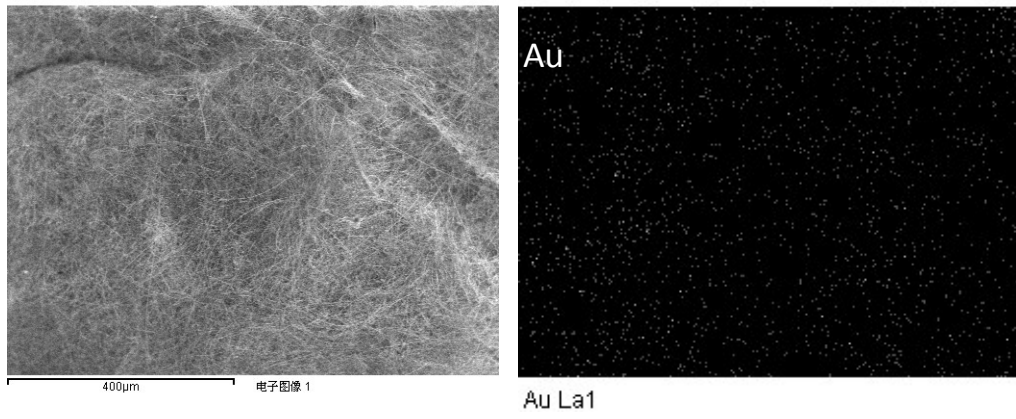

Figure S2 the SEM image and the elements maps of Au

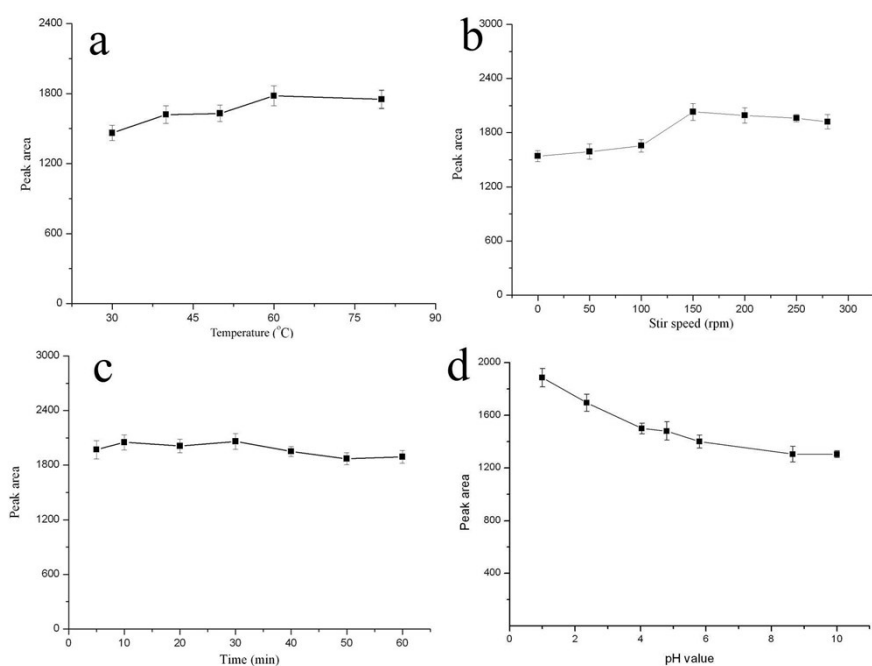

Figure S3. The detection results of  $5 \mu\text{g}\cdot\text{L}^{-1}$  Hg with different conditions of the: a) extraction temperature; b) stir speed; c) extraction time; d) pH value.

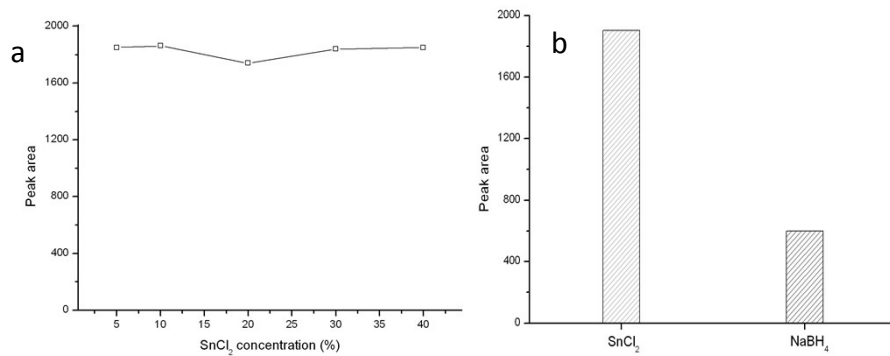

Figure S4 (a) the Hg detection peak area on ZAAS with different concentration of SnCl<sub>2</sub> (b) the different reductant of SnCl<sub>2</sub> and NaBH<sub>4</sub> for the Hg reduction during the HS-SPE, the spiked concentration of Hg is 5 ug·L<sup>-1</sup> and 1 mL SnCl<sub>2</sub> and NaBH<sub>4</sub> are added, respectively.

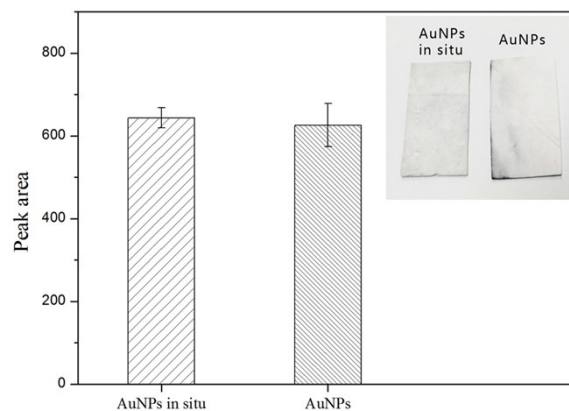

Figure S5. The mercury detection results (Peak area) based on the AgNPs in situ and AuNPs loaded filter paper in SPE method with the corresponding photographs. (SPE condition: 1 mL,  $1 \mu\text{g}\cdot\text{L}^{-1}\text{Hg}^{2+}$  standard solution, room temperature, stirring for 5 min)

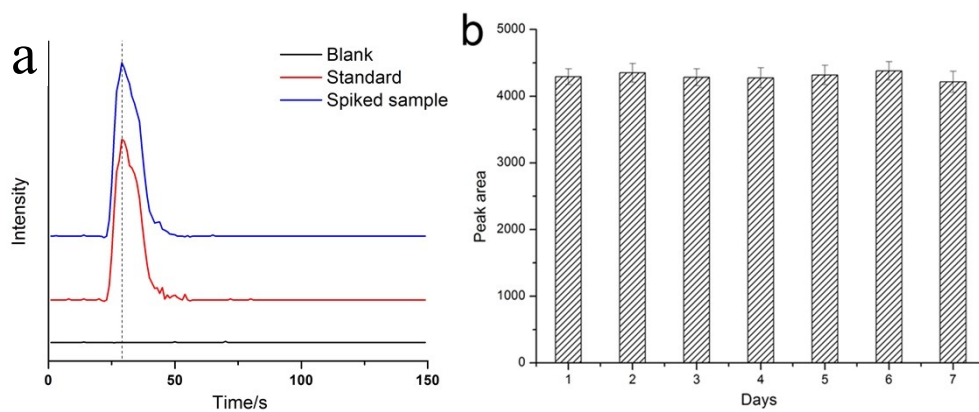

Figure S6 (a) the corresponding detect peak intensity of blank, standard and spiked sample on ZAAS. (b) The stability test results of AuNPs in-situ modified filter paper of the same batch in 7 consecutive days with Hg(II) standard concentration of  $10 \mu\text{g}\cdot\text{L}^{-1}$

Table S1 the extraction efficiency for Hg standard samples with different concentration

| Pre-extraction concentration<br>µg/L | Post-extraction concentration<br>µg/L | Extraction efficiency /% | Average extraction efficiency /% |
|--------------------------------------|---------------------------------------|--------------------------|----------------------------------|
| 0.5                                  | 0.079                                 | 84.2                     | 88.12                            |
|                                      | 0.058                                 | 88.4                     |                                  |
|                                      | 0.041                                 | 91.8                     |                                  |
|                                      | 0.037                                 | 92.6                     |                                  |
|                                      | 0.082                                 | 83.6                     |                                  |
| 1.0                                  | 0.099                                 | 90.10                    | 91.66                            |
|                                      | 0.118                                 | 88.20                    |                                  |
|                                      | 0.073                                 | 92.70                    |                                  |
|                                      | 0.060                                 | 94.00                    |                                  |
|                                      | 0.067                                 | 93.30                    |                                  |
| 5.0                                  | 0.108                                 | 97.84                    | 98.16                            |
|                                      | 0.112                                 | 97.76                    |                                  |
|                                      | 0.140                                 | 97.20                    |                                  |
|                                      | 0.075                                 | 98.50                    |                                  |
|                                      | 0.025                                 | 99.50                    |                                  |
| 10                                   | 0.045                                 | 99.55                    | 99.53                            |
|                                      | 0.045                                 | 99.55                    |                                  |
|                                      | 0.032                                 | 99.68                    |                                  |
|                                      | 0.060                                 | 99.40                    |                                  |
|                                      | 0.054                                 | 99.46                    |                                  |



**Table S2.** The compared detection Recoveries and RSDs with ICP-MS for the real water samples with different spiked level from 0.5 to 10  $\mu\text{g}\cdot\text{L}^{-1}$ .

| Samples     | Spiked( $\mu\text{g}\cdot\text{L}^{-1}$ )<br>$\text{Hg}^{2+}$ | ICP-MS          |        | This method     |        |
|-------------|---------------------------------------------------------------|-----------------|--------|-----------------|--------|
|             |                                                               | Recovery(<br>%) | RSD(%) | Recovery(<br>%) | RSD(%) |
| Tap water   | 0.50                                                          | 97.2            | 1.12   | 87.8            | 4.97   |
|             | 1.00                                                          | 103             | 6.66   | 99.2            | 4.26   |
|             | 5.00                                                          | 97.8            | 1.41   | 102             | 6.28   |
|             | 10.0                                                          | 101             | 2.05   | 106             | 5.74   |
| River water | 0.50                                                          | 92.4            | 0.86   | 85.7            | 4.50   |
|             | 1.00                                                          | 109             | 1.58   | 105             | 5.50   |
|             | 5.00                                                          | 91.2            | 2.04   | 98.0            | 4.07   |
|             | 10.0                                                          | 85.4            | 2.05   | 105             | 3.75   |
| Waste water | 0.50                                                          | 107             | 1.14   | 89.2            | 6.19   |
|             | 1.00                                                          | 107             | 5.06   | 111             | 3.87   |
|             | 5.00                                                          | 109             | 2.74   | 82.6            | 2.42   |
|             | 10.0                                                          | 108             | 2.36   | 101             | 6.57   |
